# Supplementary material for: Cytotoxic Compounds from Juglans sinensis Dode Display Anti-Proliferative Activity by Inducing Apoptosis in Human Cancer Cells
Source: PubMed Central journal article supplement (PMC6274522; doi:10.3390/molecules21010120), 2016-01-21
Supplement: molecules-21-00120-s001.pdf [file molecules-21-00120-s001.pdf]

# Supplementary Materials: Cytotoxic Compounds from *Juglans sinensis* Dode Display Anti-Proliferative Activity by Inducing Apoptosis in Human Cancer Cells

Yoo Jin Lee, Jun Cui, Jun Lee, Ah-Reum Han, Eun Byul Lee, Ho Hee Jang and Eun Kyoung Seo

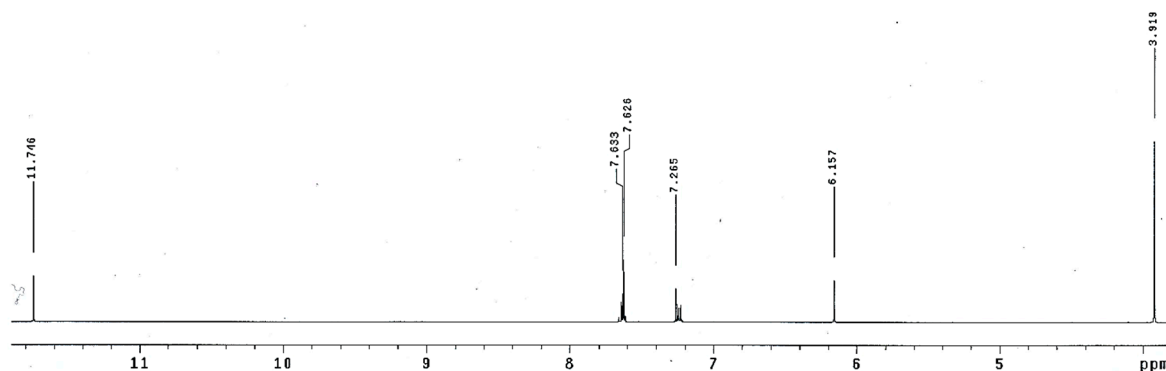

Figure S1. <sup>1</sup>H-NMR (400 MHz, CDCl<sub>3</sub>) spectrum of compound 1.

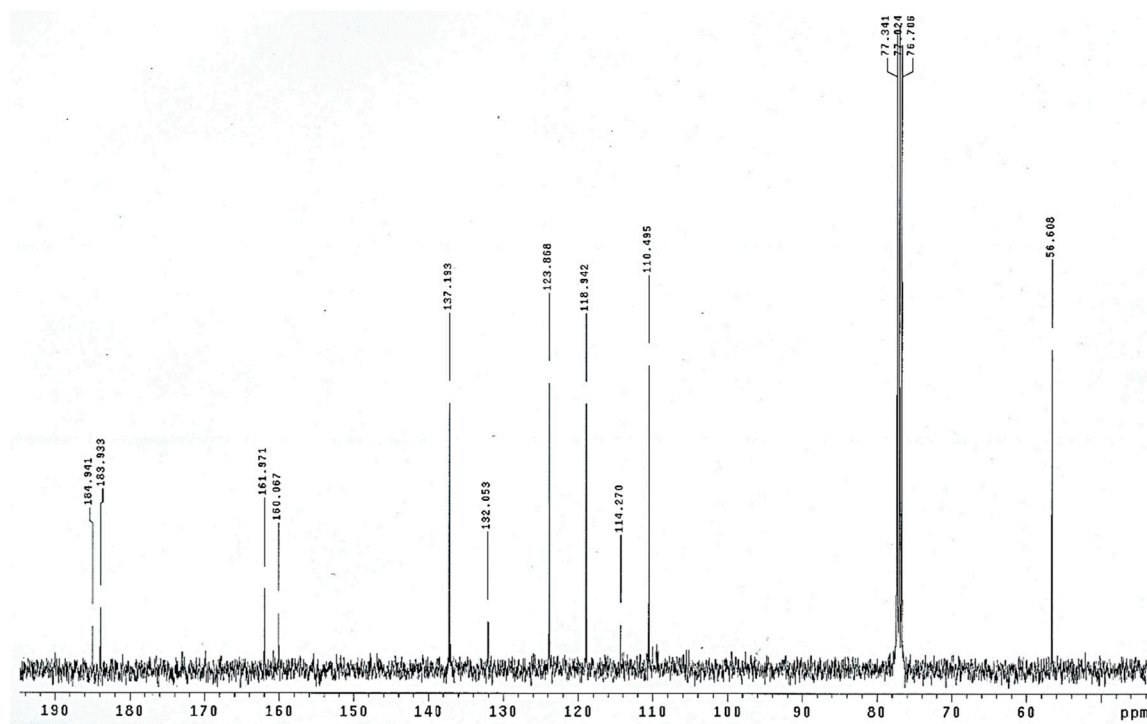

Figure S2. <sup>13</sup>C-NMR (100 MHz, CDCl<sub>3</sub>) spectrum of compound 1.

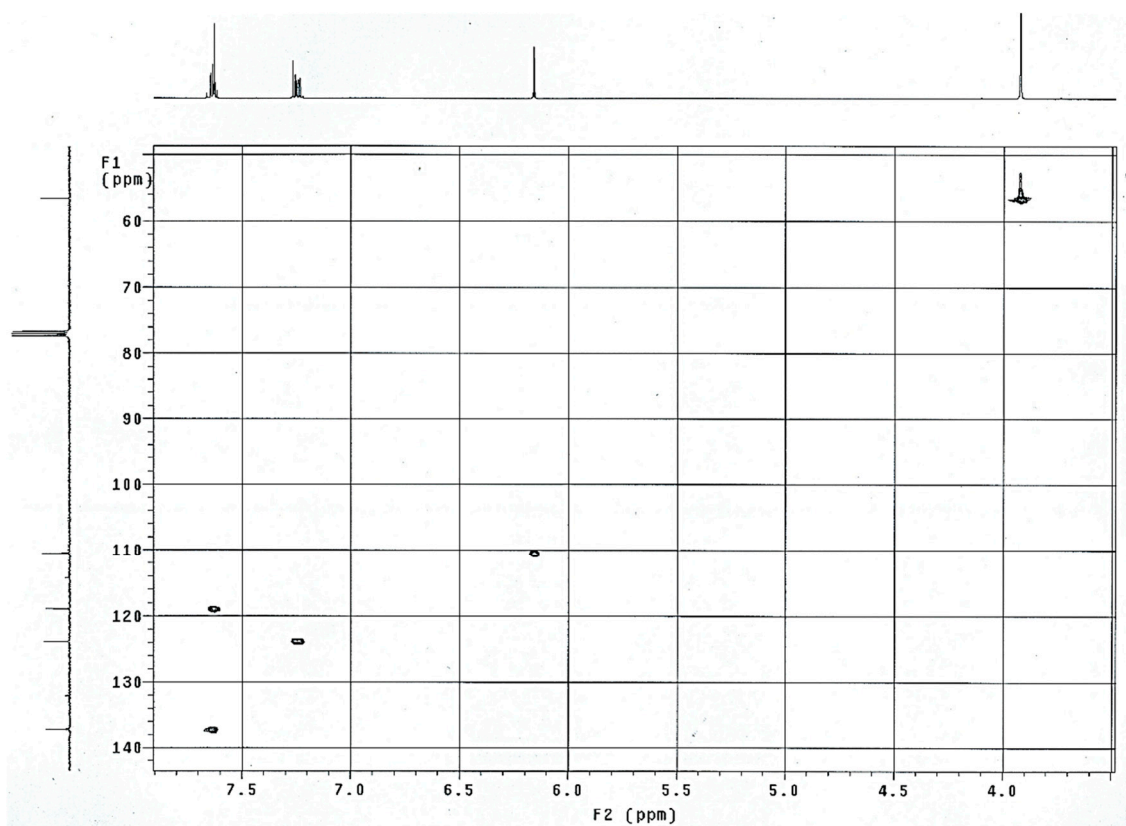

Figure S3. HSQC NMR spectrum of compound 1.

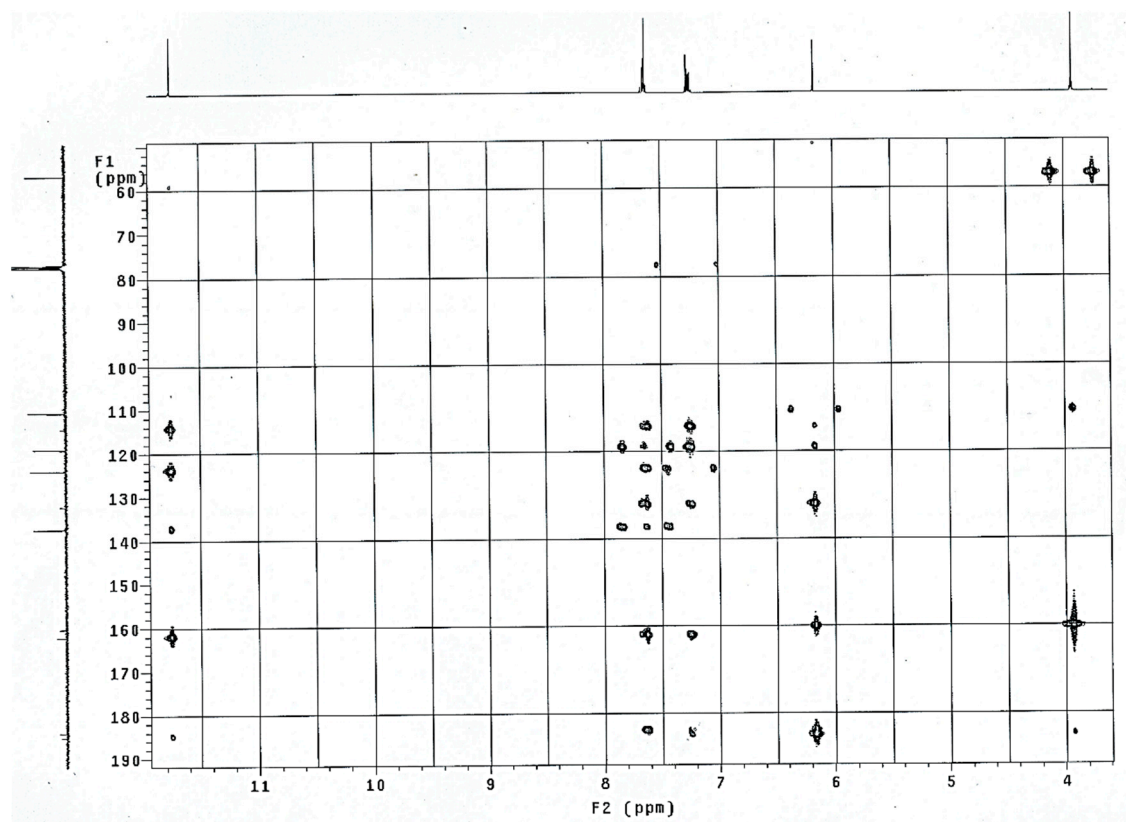

Figure S4. HMBC NMR spectrum of compound 1.

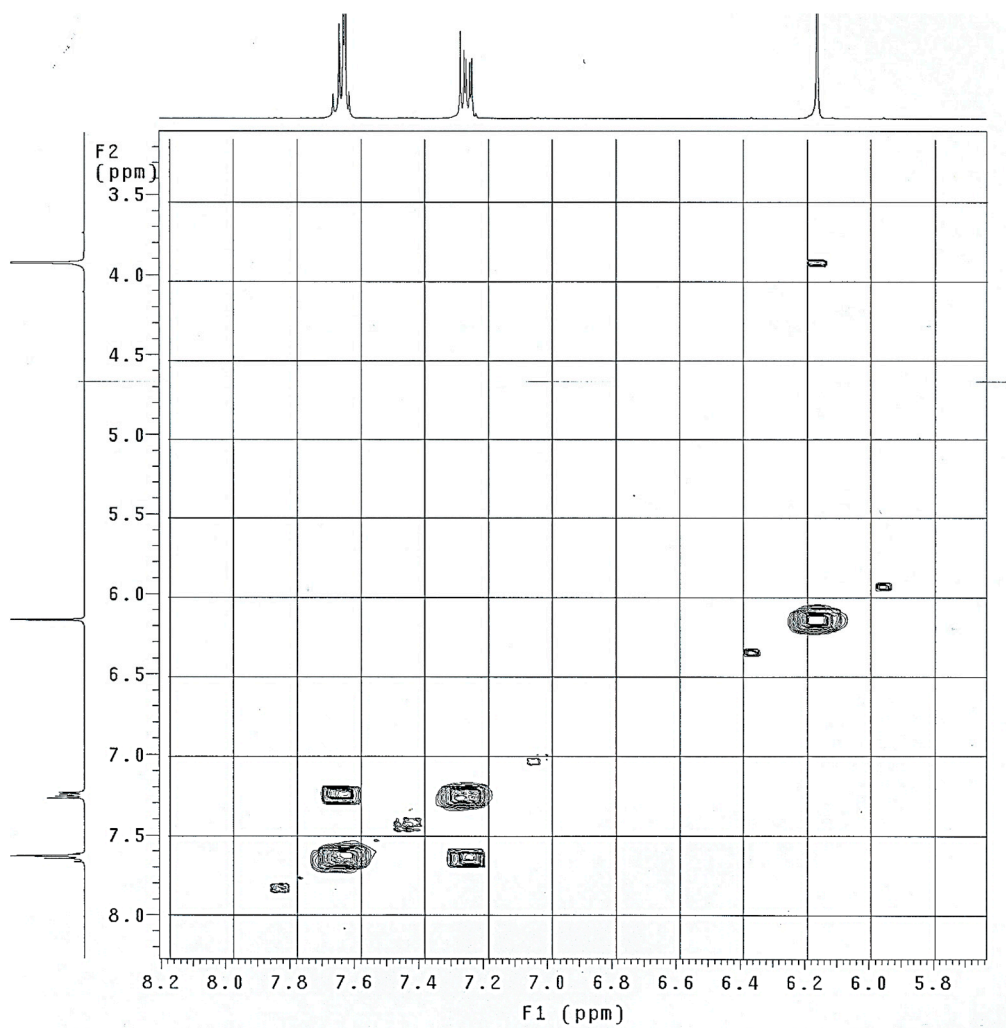

Figure S5. COSY NMR spectrum of compound 1.

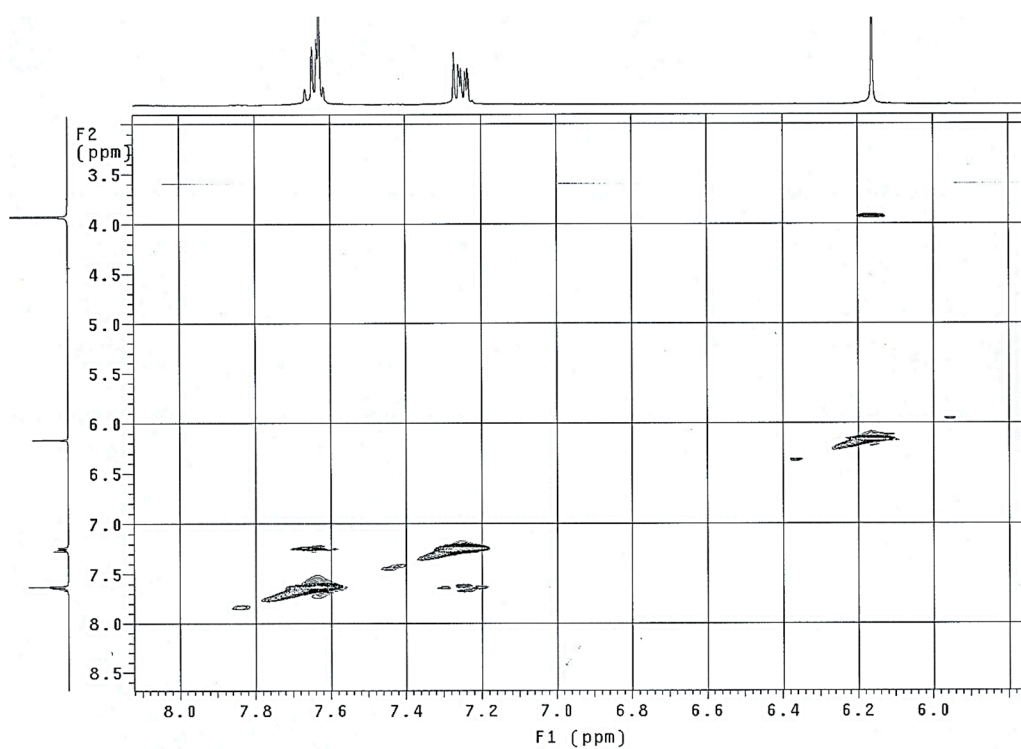

Figure S6. NOESY NMR spectrum of compound 1.

## NMR spectra for 5-hydroxy-2-methoxy-1,4-naphthoquinone (2)

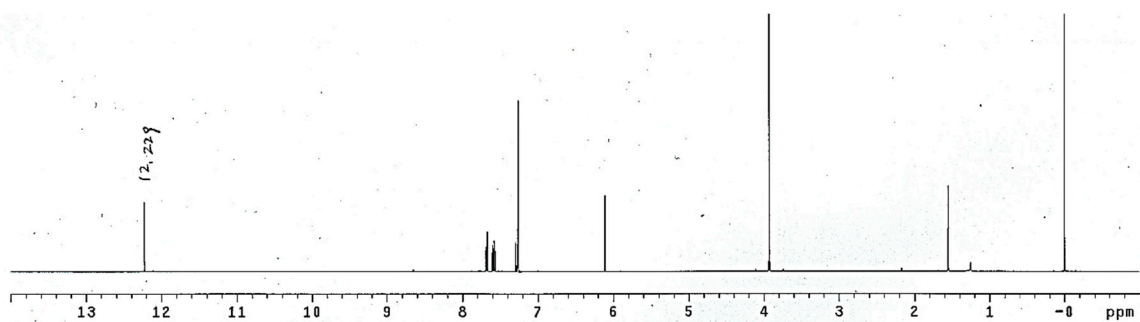Figure S7. <sup>1</sup>H-NMR (400 MHz, CDCl<sub>3</sub>) spectrum of compound 2.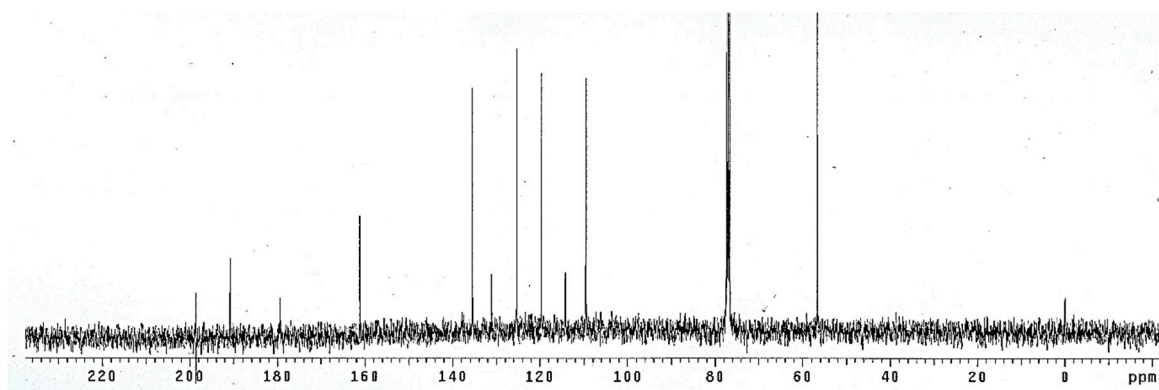Figure S8. <sup>13</sup>C-NMR (100 MHz, CDCl<sub>3</sub>) spectrum of compound 2.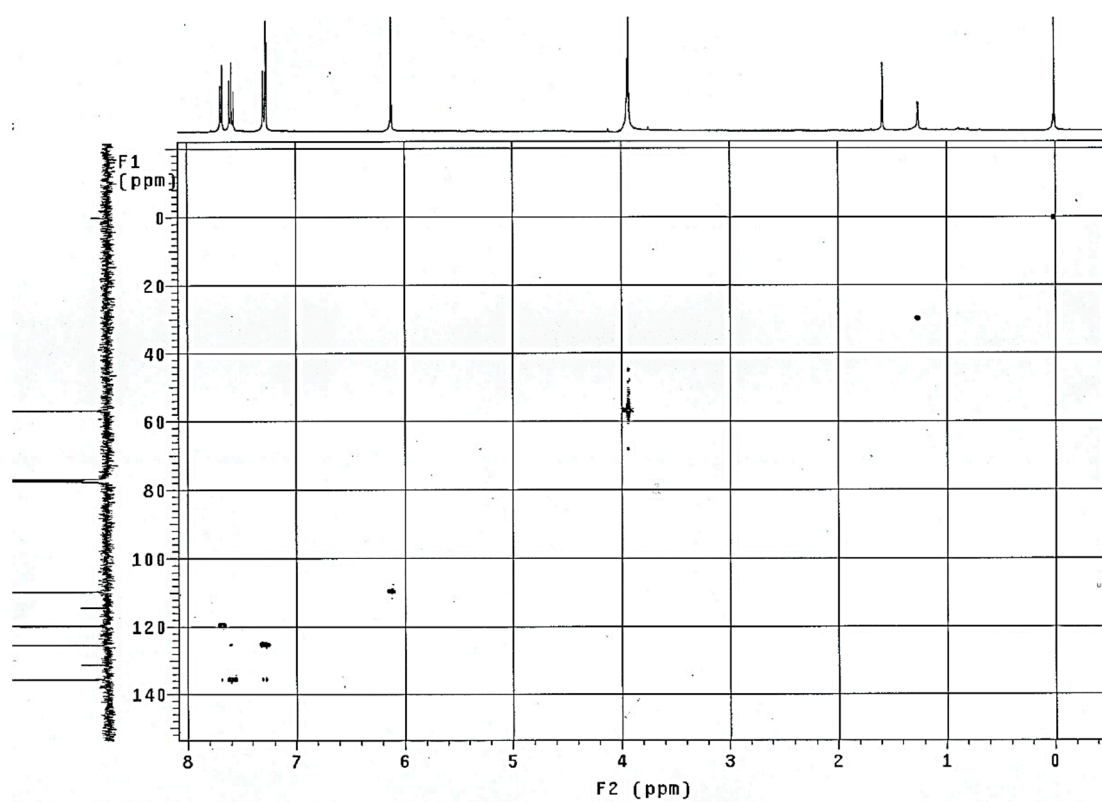

Figure S9. HSQC NMR spectrum of compound 2.

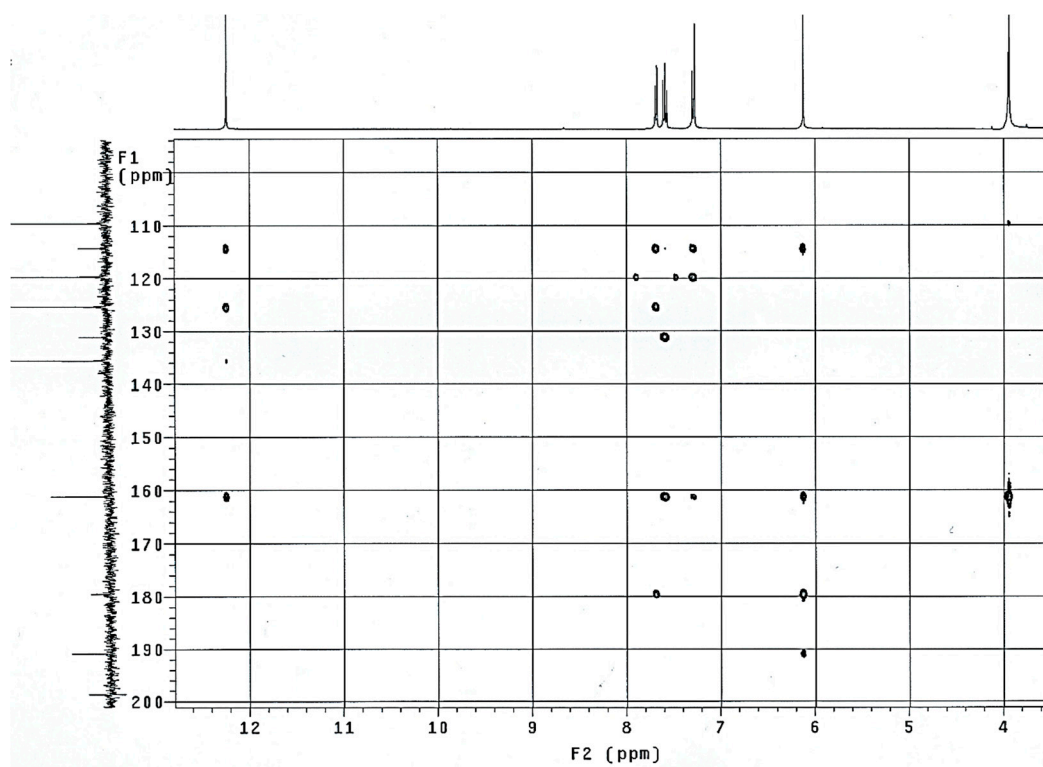

Figure S10. HMBC NMR spectrum of compound 2.

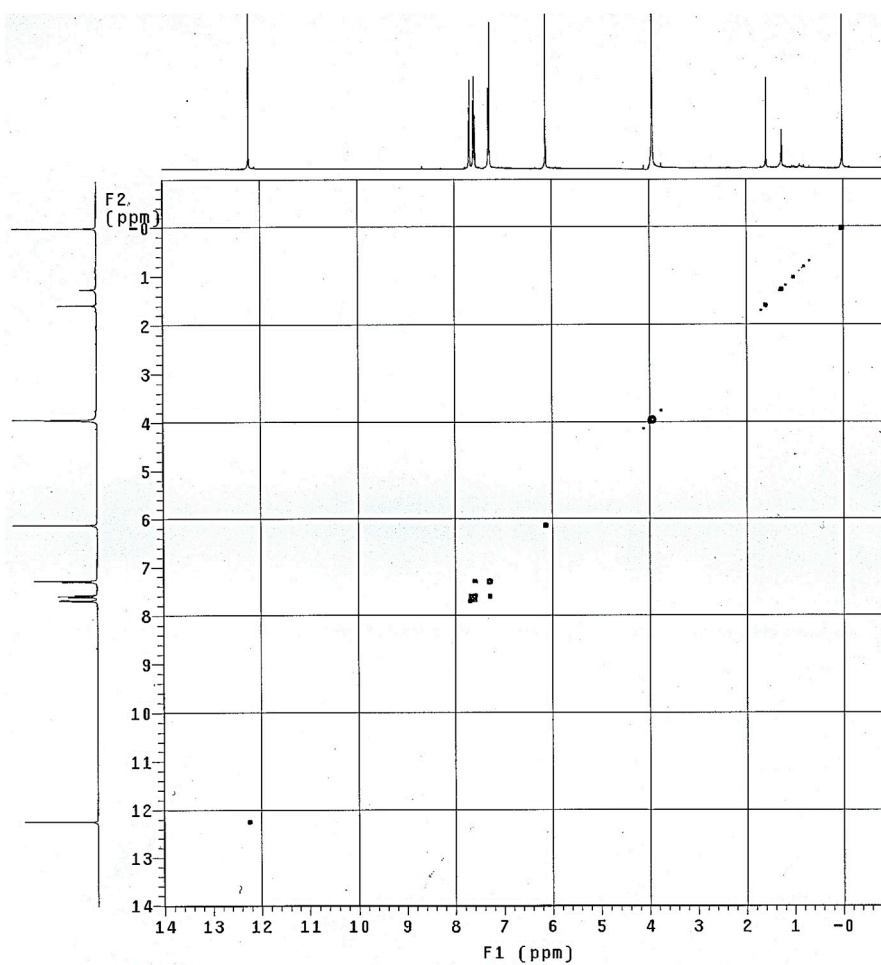

Figure S11. COSY NMR spectrum of compound 2.

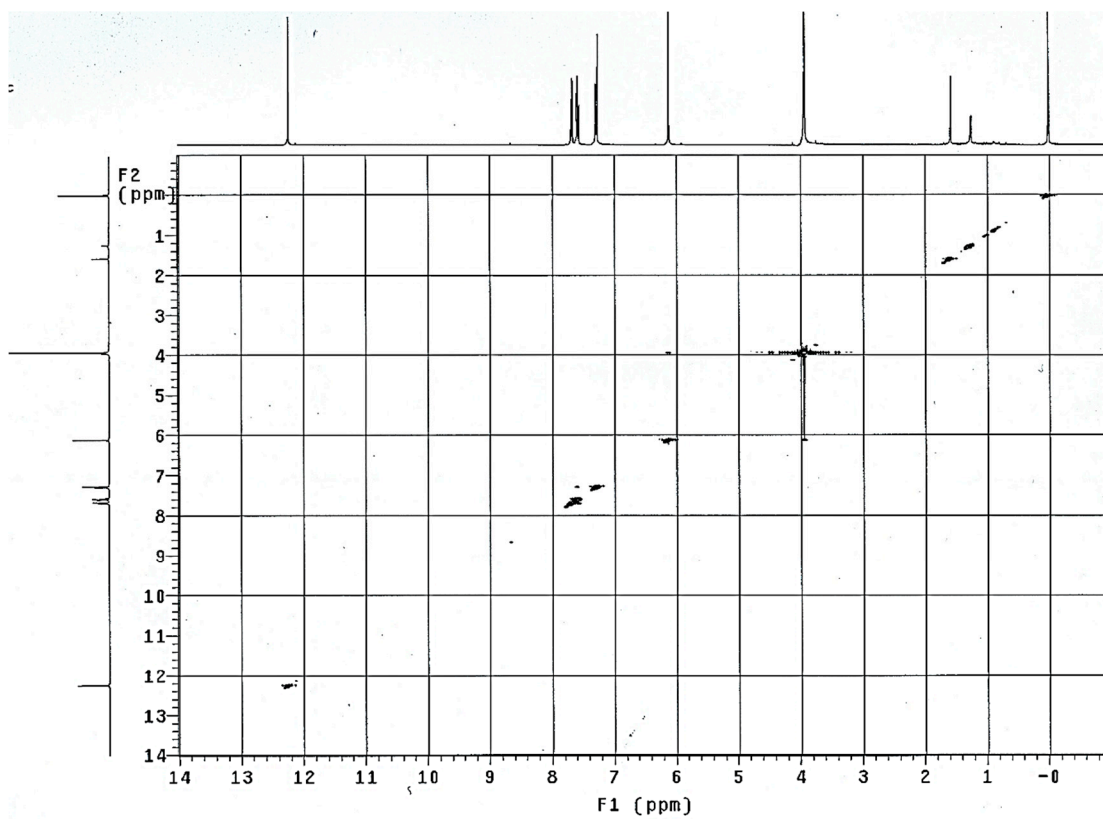

Figure S12. NOESY NMR spectrum of compound 2.
